# Supplementary figures and images for: Synthesis, mechanism of formation, and catalytic activity of Xantphos nickel π-complexes
Source: Royal Society of Chemistry journal article supplement (doi:10.1039/c4cc07590k), 2014-01-01

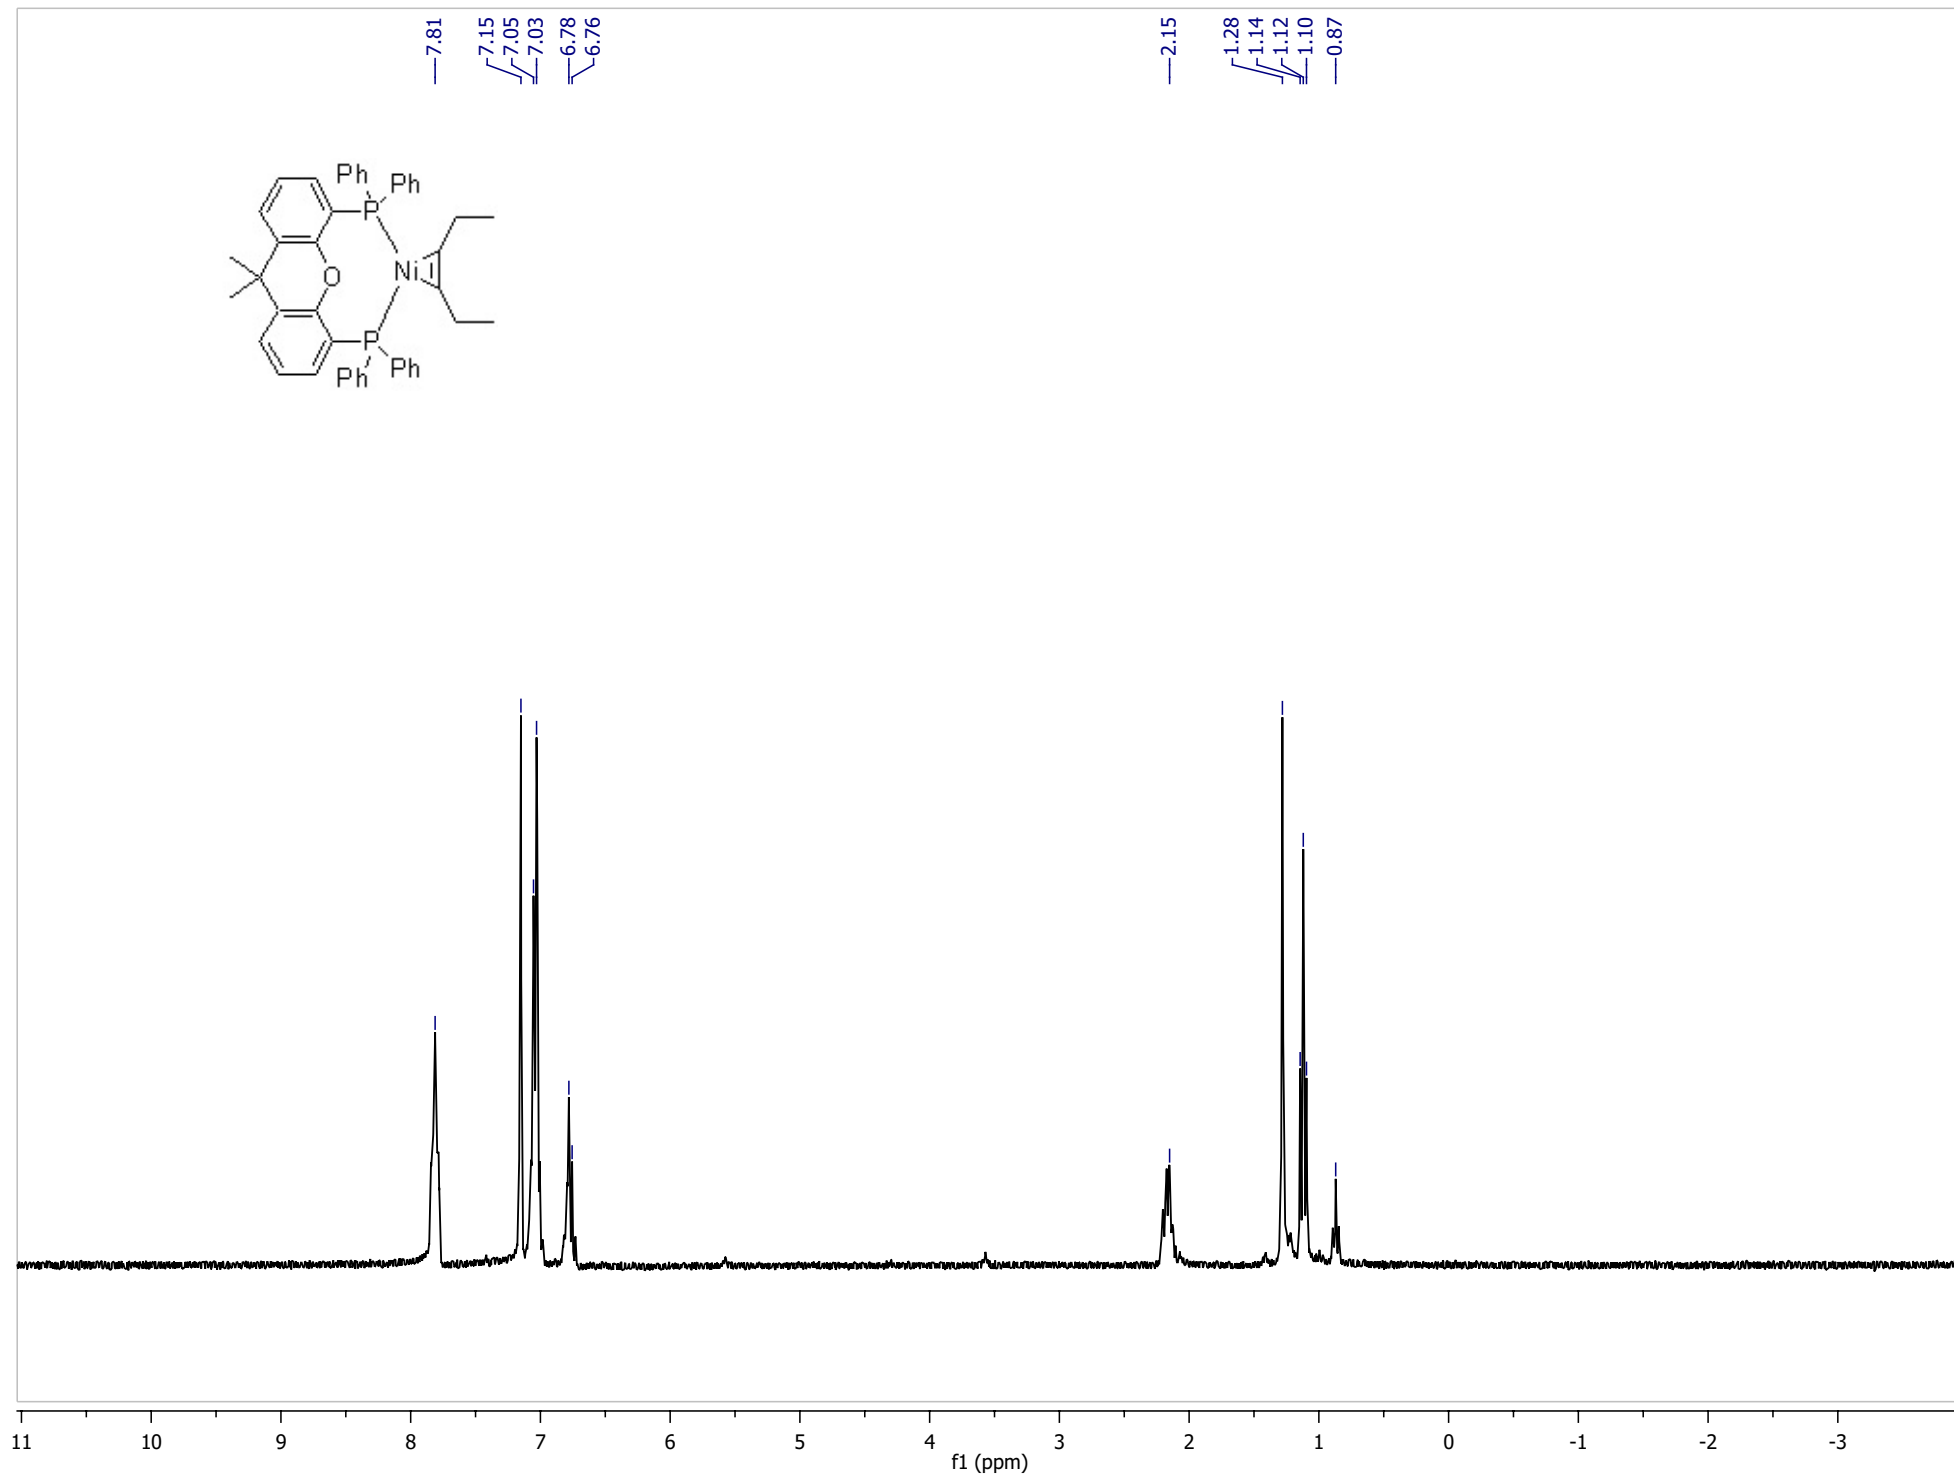

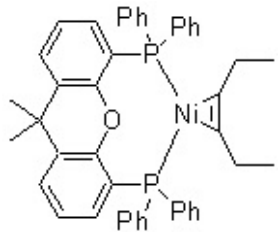

-159.06  
 -159.01  
 -158.95  
 -138.11  
 -137.93  
 -137.74  
 -136.52  
 -134.90  
 -134.83  
 -134.76  
 -132.50  
 -129.46  
 -129.15  
 -128.86  
 -128.81  
 -128.77  
 -128.62  
 -128.50  
 -128.38  
 -127.42  
 -127.31  
 -127.15  
 -127.10  
 -125.90  
 -124.25

-37.57  
 -27.33  
 -20.72  
 -20.65  
 -16.90

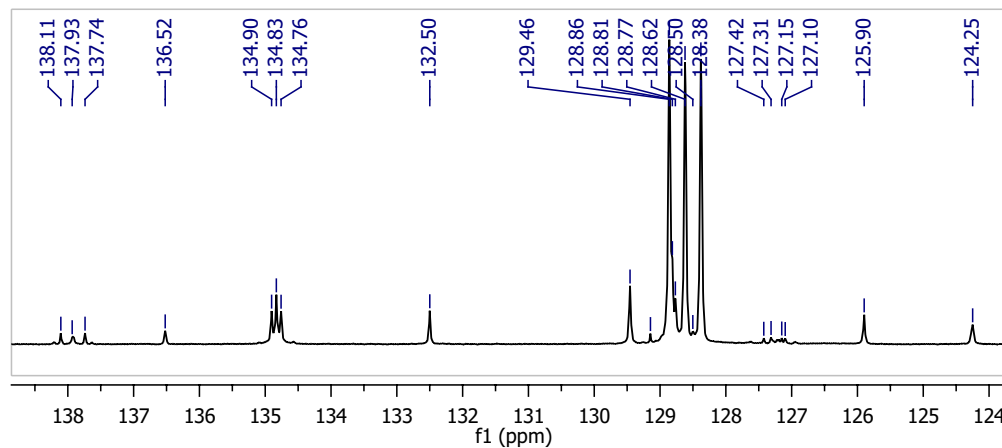

230 220 210 200 190 180 170 160 150 140 130 120 110 100 90 80 70 60 50 40 30 20 10 0 -10  
 f1 (ppm)

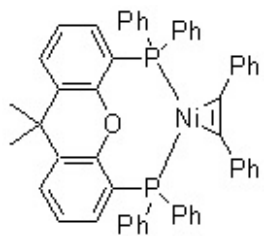

7.35  
7.33  
7.15  
6.84  
6.48  
6.26

1.48

10.0 9.5 9.0 8.5 8.0 7.5 7.0 6.5 6.0 5.5 5.0 4.5 4.0 3.5 3.0 2.5 2.0 1.5 1.0 0.5 0.0 -0.5

f1 (ppm)

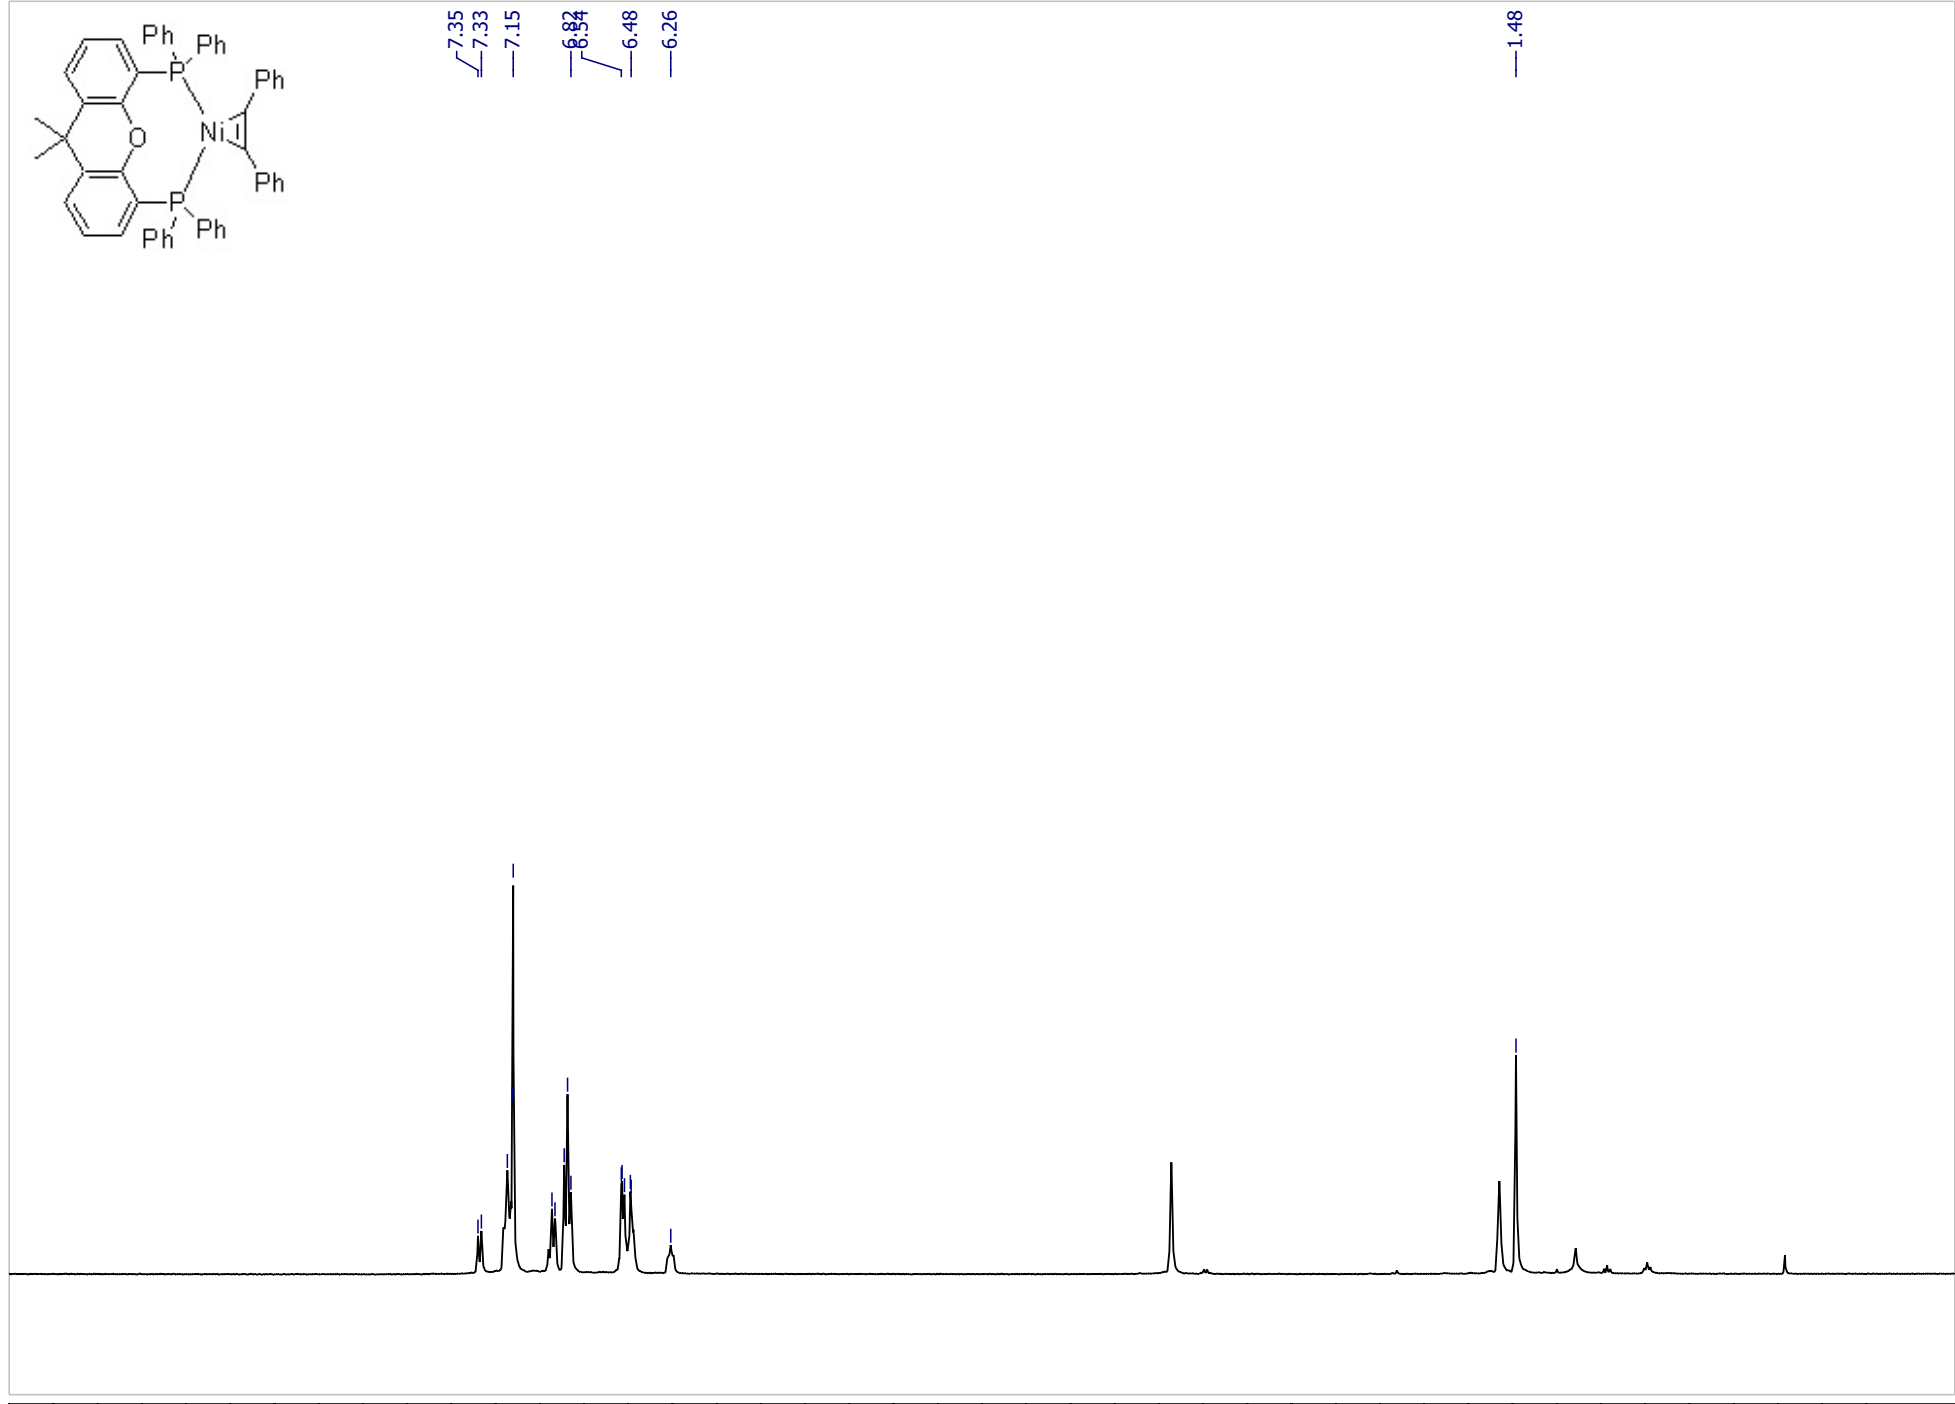

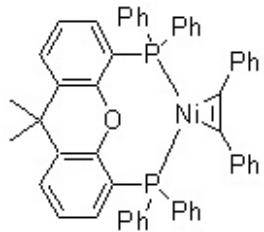

158.61  
138.08  
136.78  
136.00  
135.79  
135.61  
135.29  
135.22  
135.15  
135.02  
132.33  
129.84  
129.59  
128.98  
128.93  
128.89  
128.37  
128.20  
126.85  
125.02  
124.55

38.09

27.64

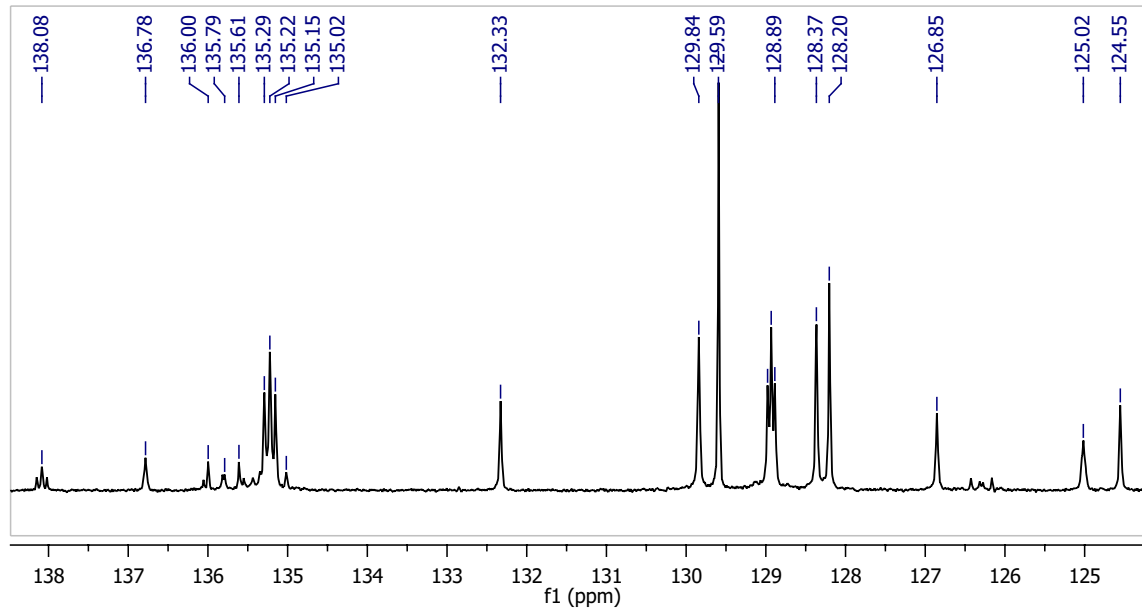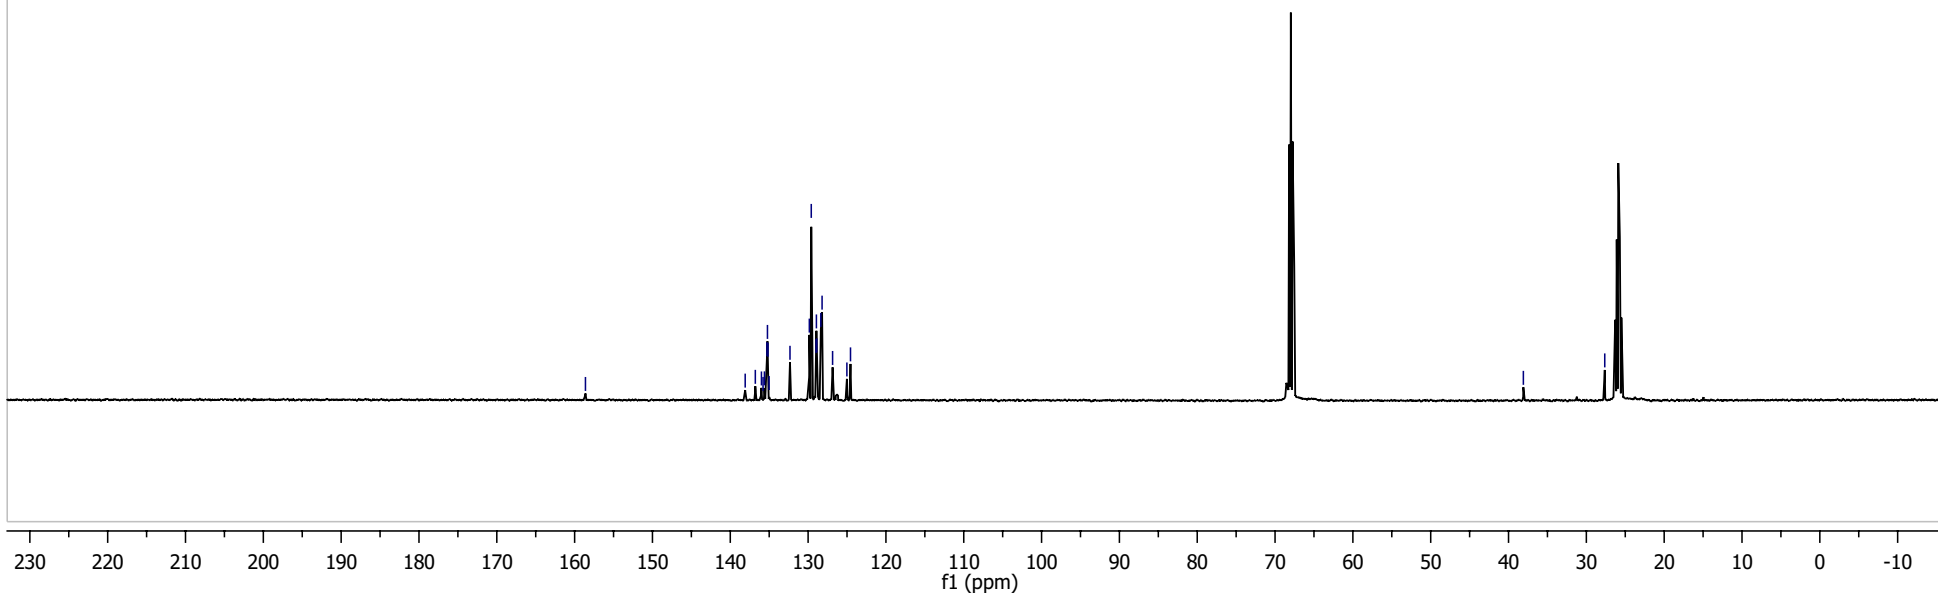

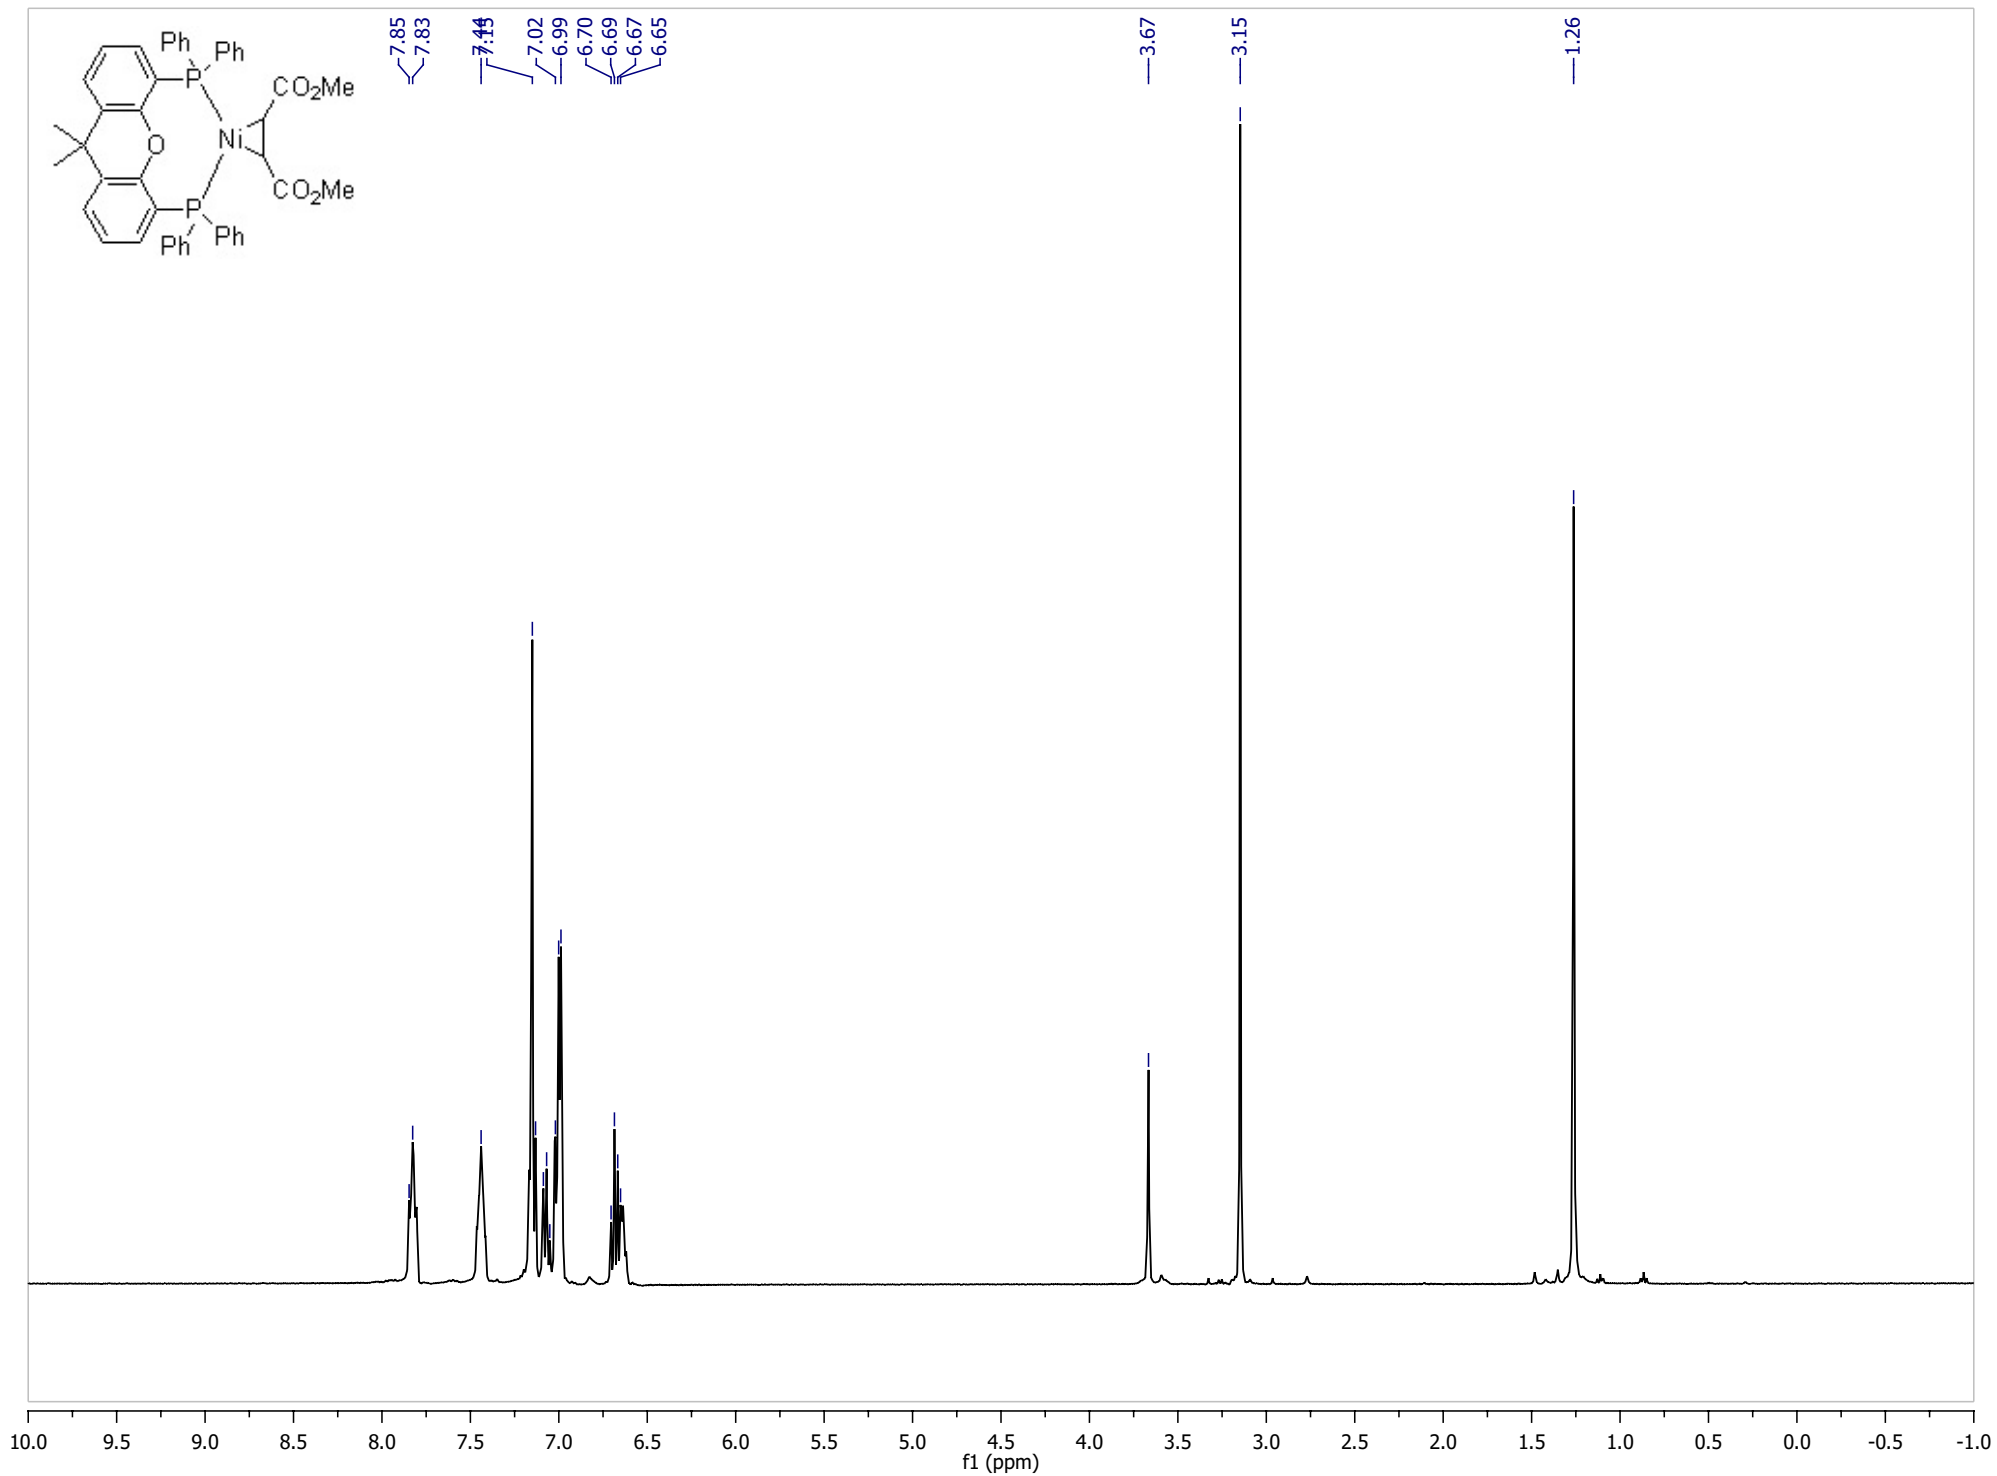

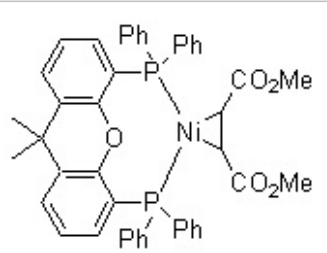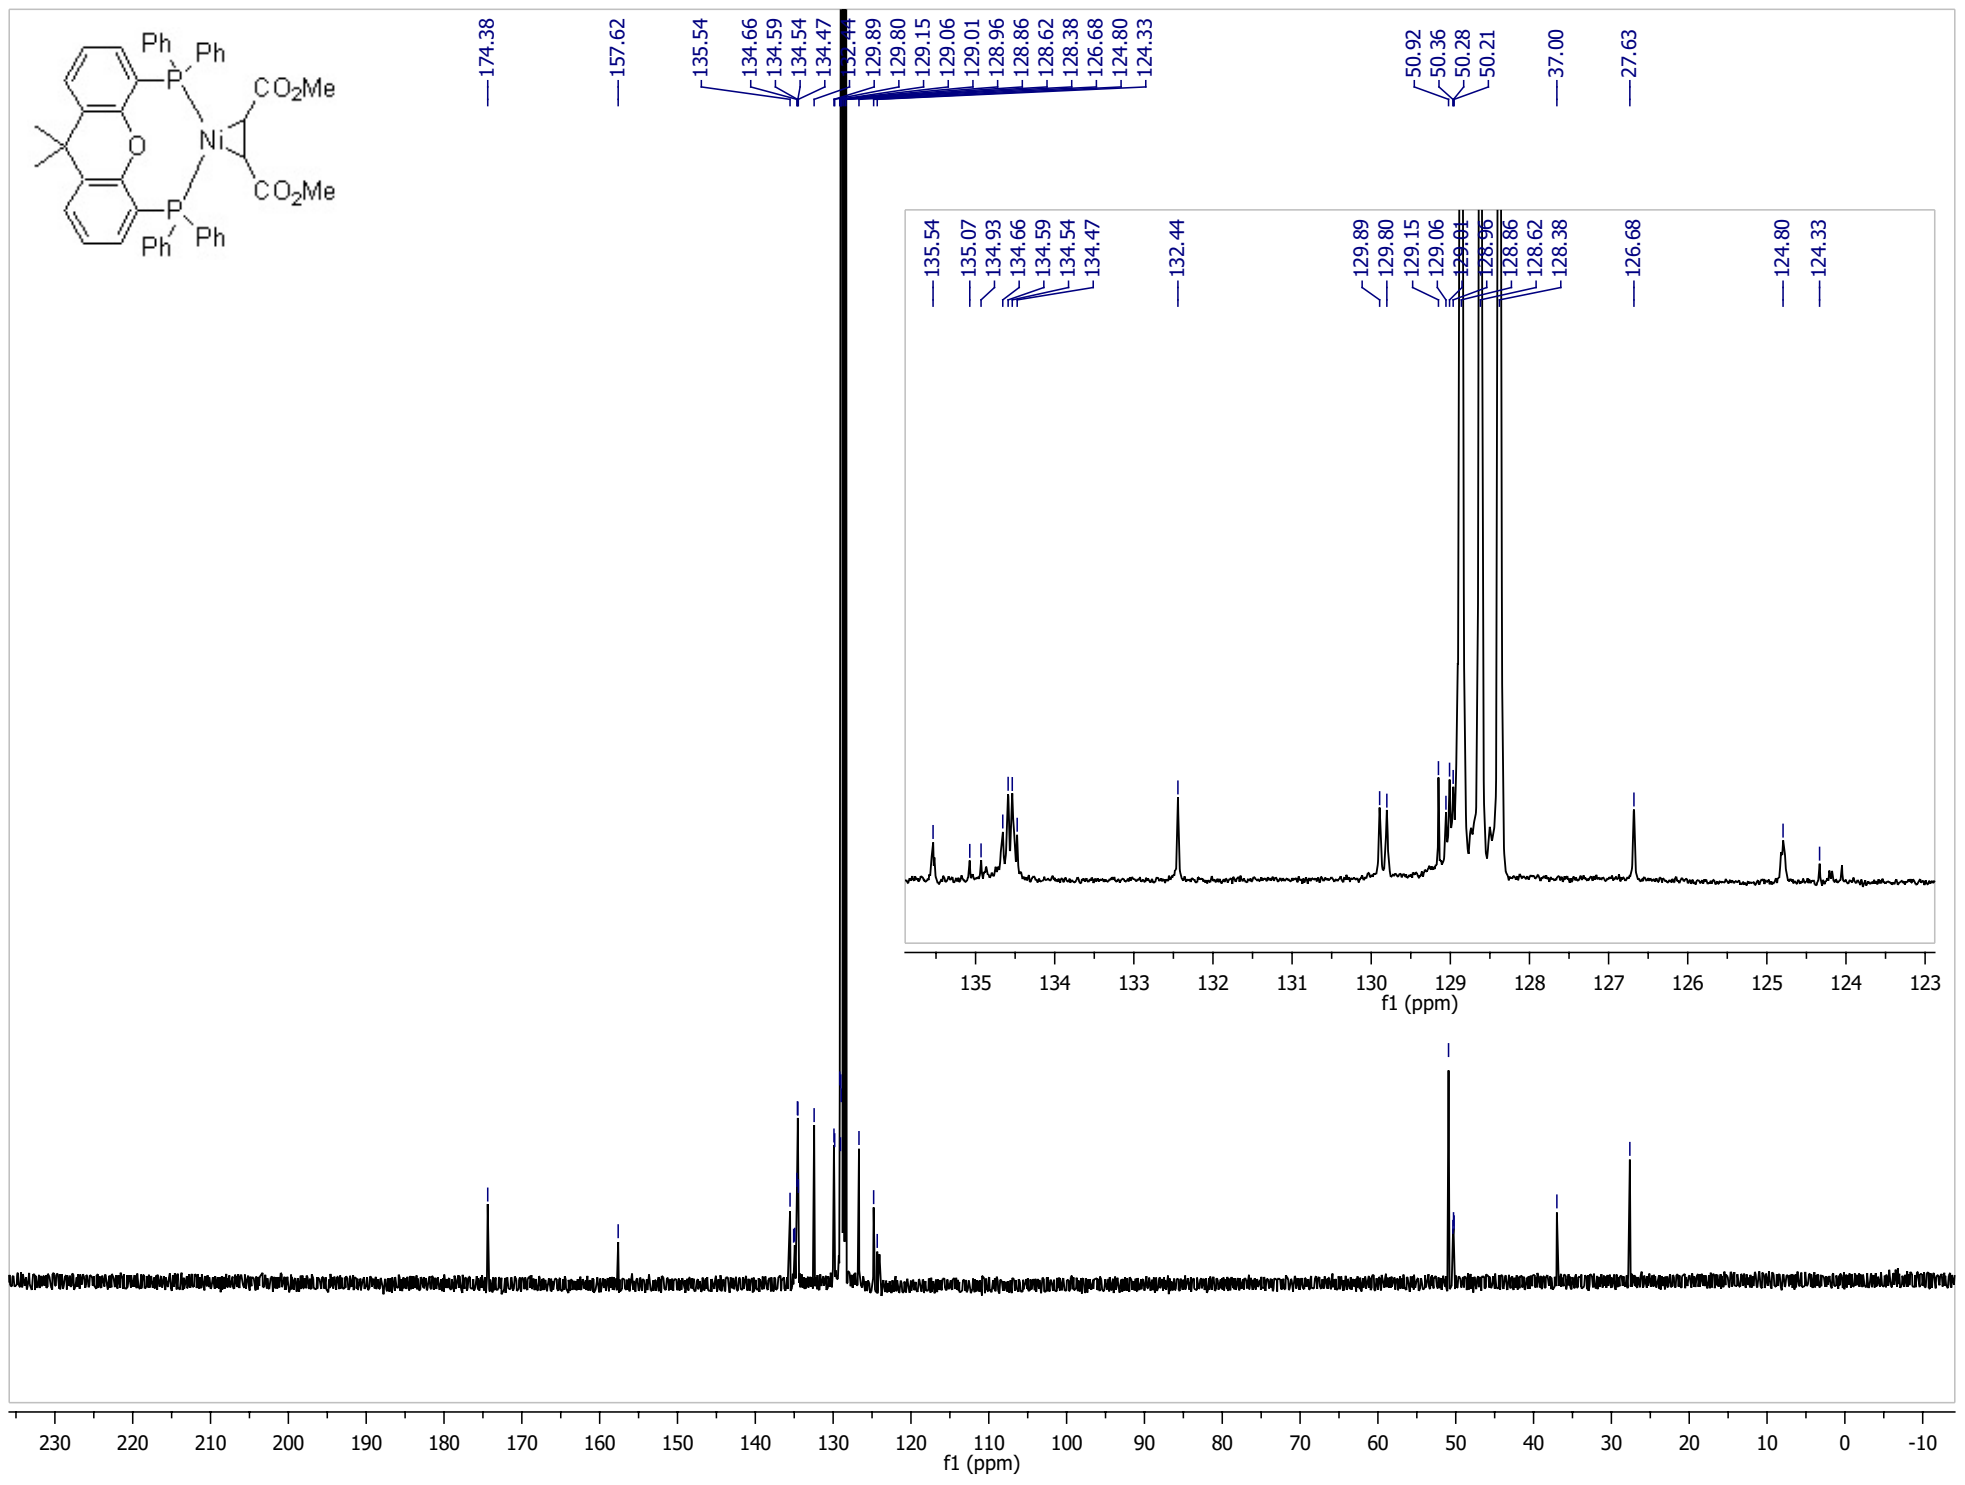

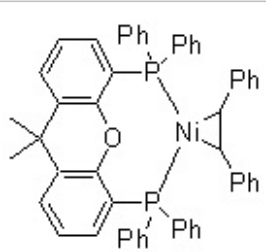

7.63  
7.06  
7.01  
6.97  
6.78  
6.72  
6.70  
6.68

3.97

1.23

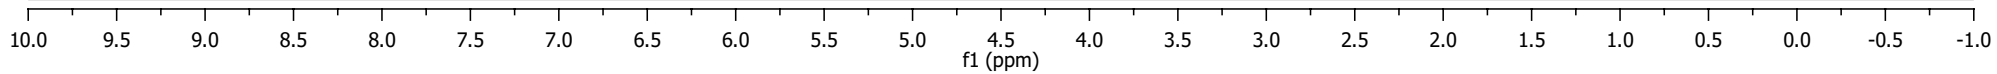

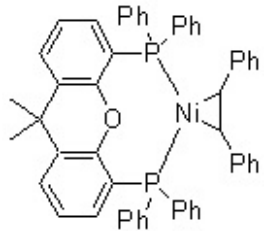

—157.60 —147.03 —133.68 —133.62 —131.81 —129.51 —129.15 —128.86 —128.72 —128.69 —128.62 —128.50 —128.38 —126.69 —126.44 —124.72 —123.77 —65.58 —36.86 —27.68

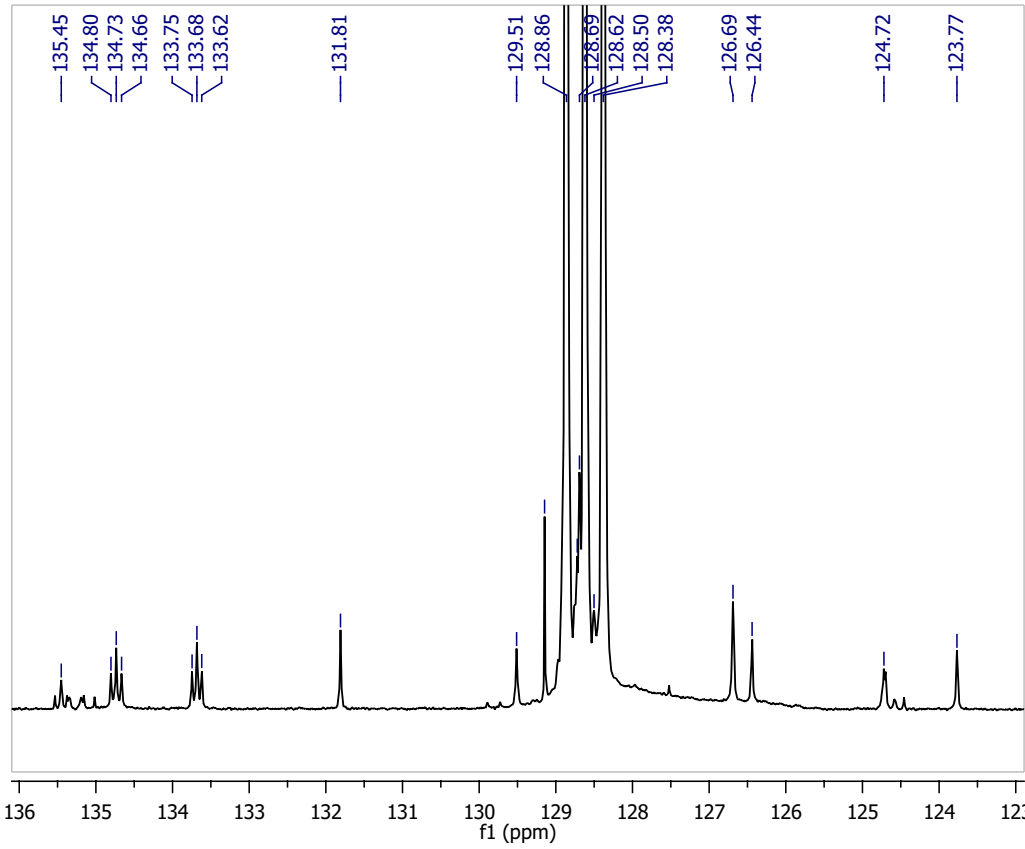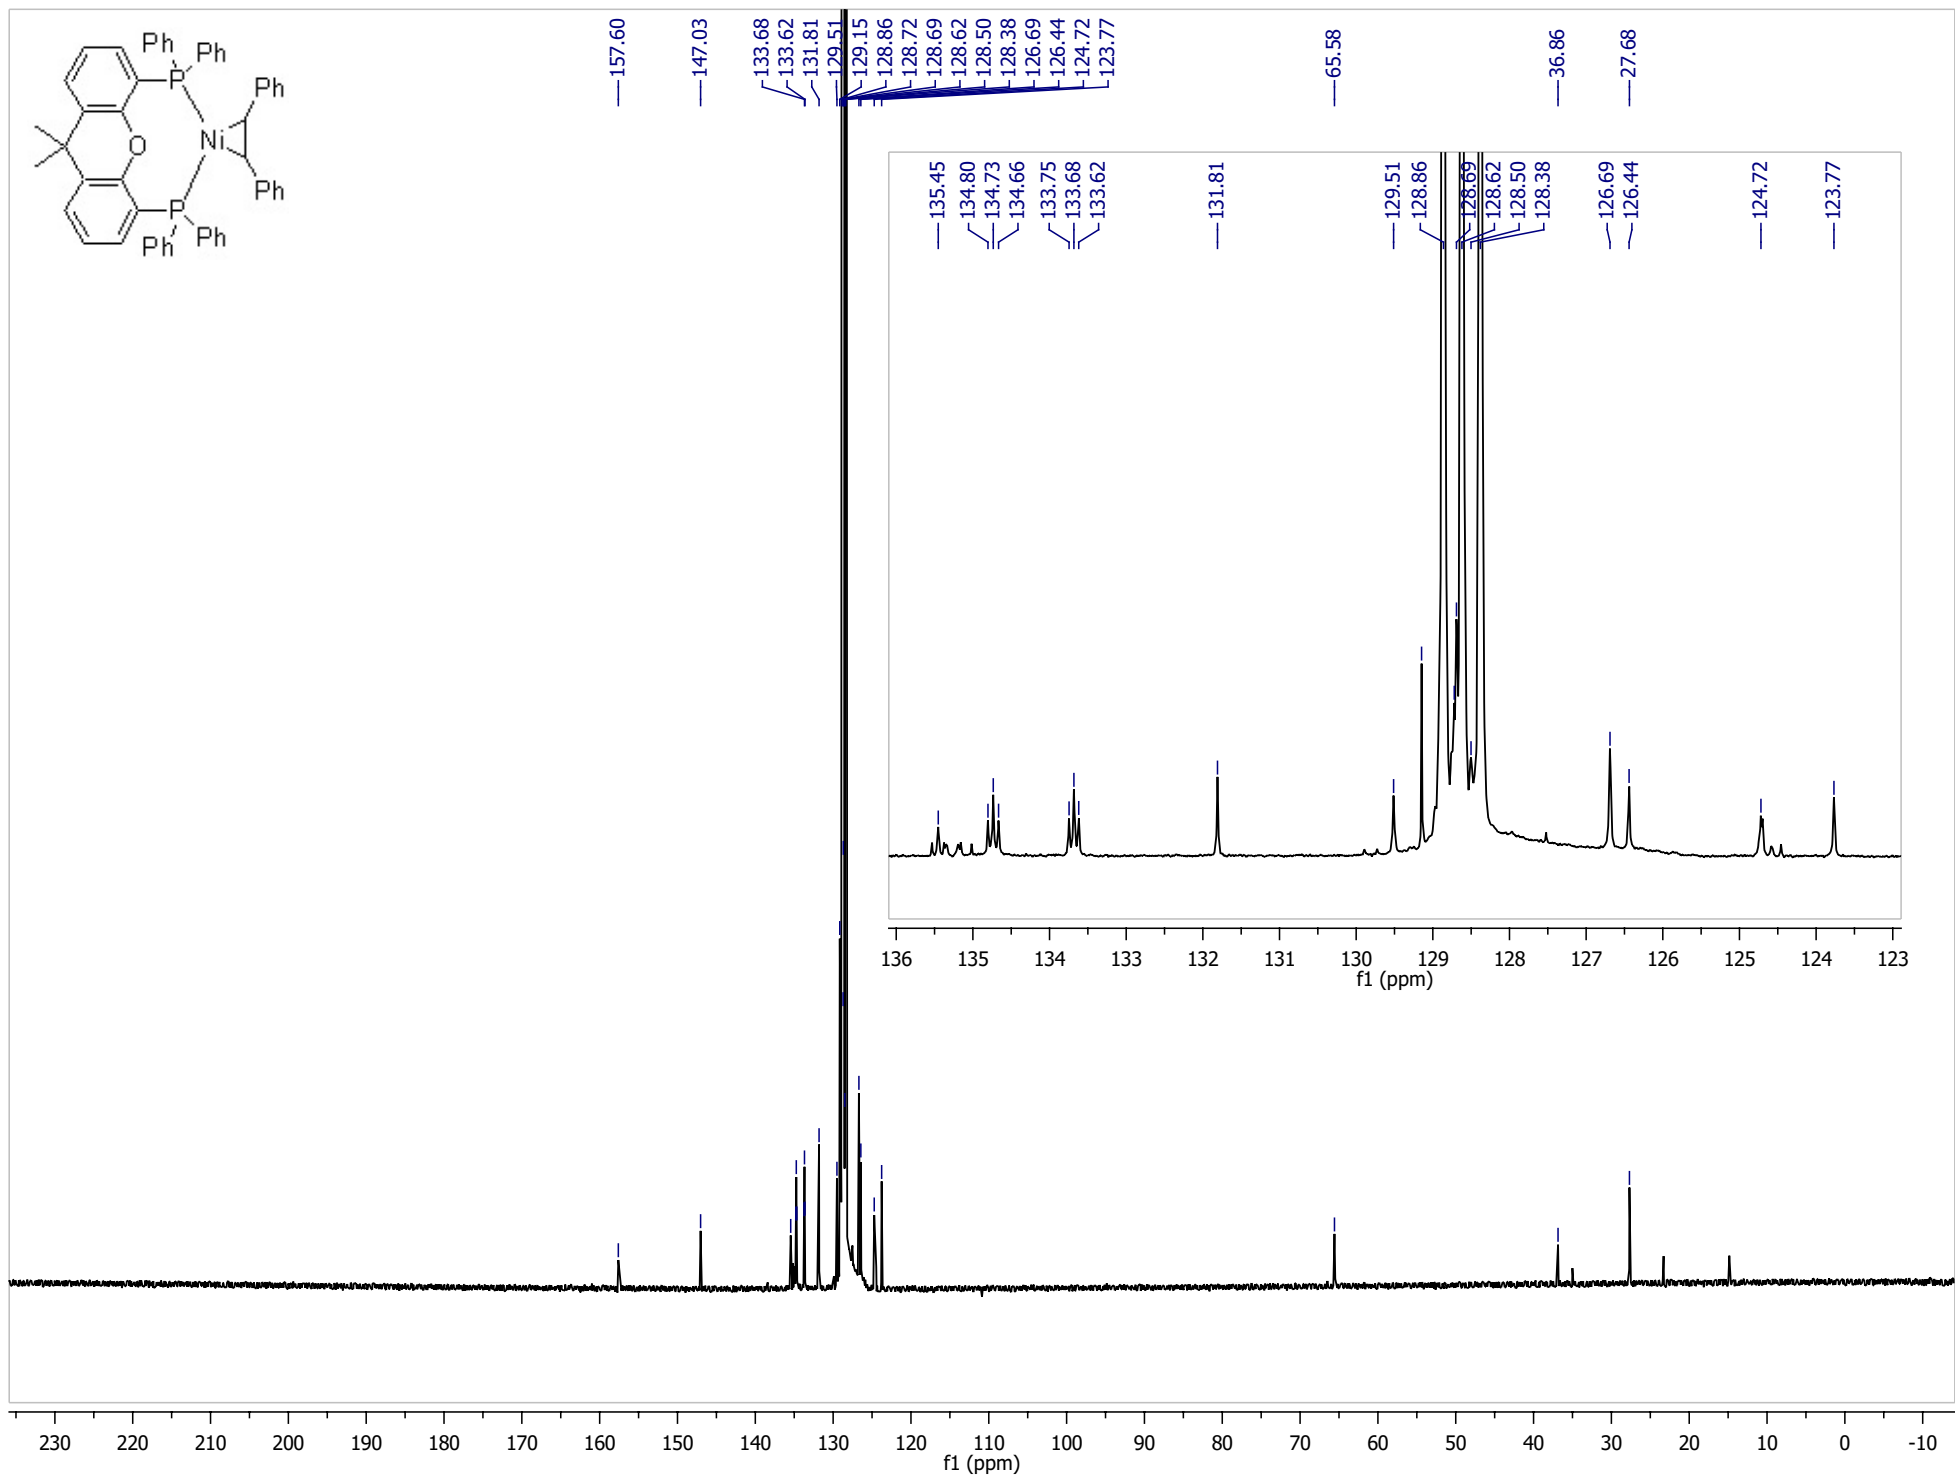



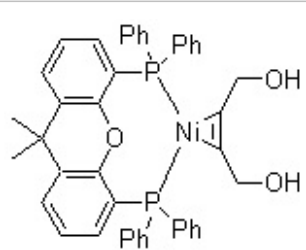

7.65  
7.15  
7.03  
6.97  
6.71

4.09

3.05

1.27

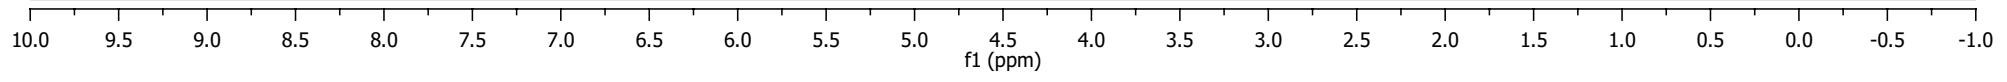

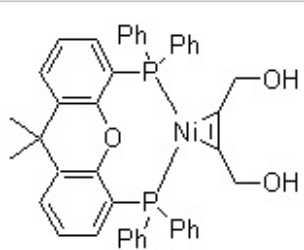

- 158.69
- 158.64
- 158.58
- 137.91
- 137.51
- 136.31
- 134.44
- 134.37
- 134.30
- 132.60
- 129.77
- 129.15
- 129.10
- 129.06
- 129.01
- 128.86
- 128.62
- 128.38
- 126.35
- 124.44

- 59.39
- 37.44
- 27.40

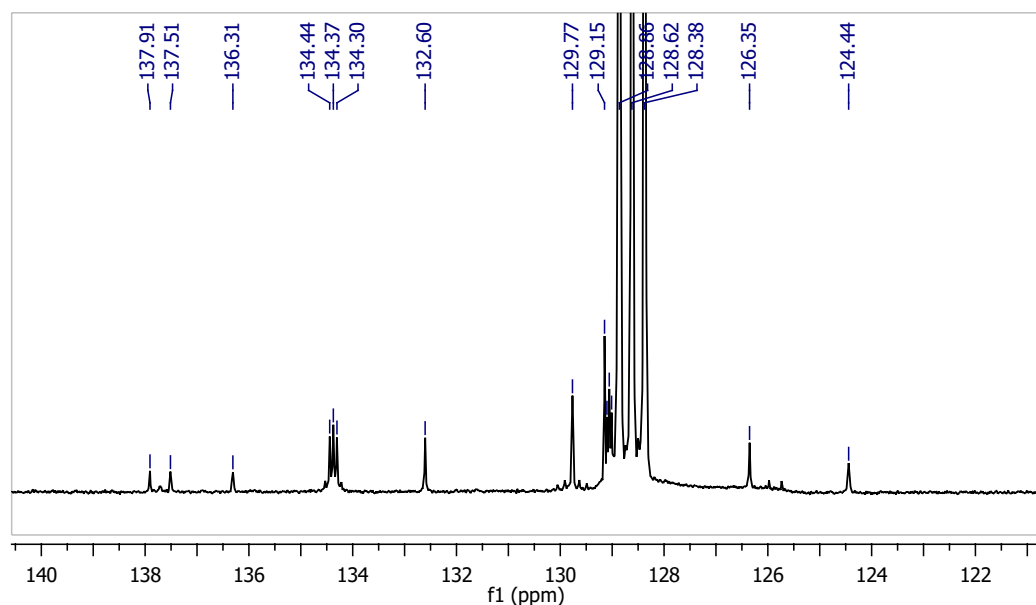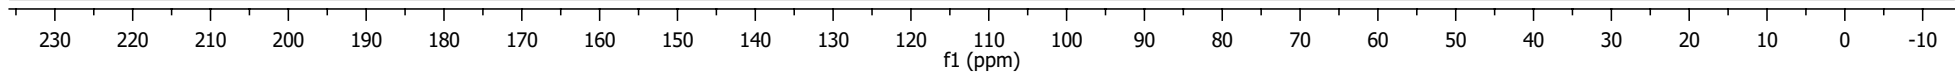

Supplement: c4cc07590k2.pdf [file c4cc07590k2.pdf]
